# Supplementary material for: An Analysis of the Expression and Association with Immune Cell Infiltration of the cGAS/STING Pathway in Pan-Cancer
Source: PubMed Central journal article supplement — Mol Ther Nucleic Acids. 2018 Nov 20;14:80–9. doi: 10.1016/j.omtn.2018.11.003 (PMC6305687; doi:10.1016/j.omtn.2018.11.003), 2018-11-20
Supplement: mmc1.pdf [file mmc1.pdf]

OMTN, Volume 14

## **Supplemental Information**

### **An Analysis of the Expression and Association with Immune Cell Infiltration of the cGAS/STING Pathway in Pan-Cancer**

**Xiang An, Yuanyuan Zhu, Tongsen Zheng, Guangyu Wang, Minghui Zhang, Jiade Li, Hongbo Ji, Shijun Li, Shucui Yang, Dandan Xu, Zhiwei Li, Tianzhen Wang, Yan He, Lei Zhang, Weiwei Yang, Ran Zhao, Dapeng Hao, and Xiaobo Li**

**Figure S1**

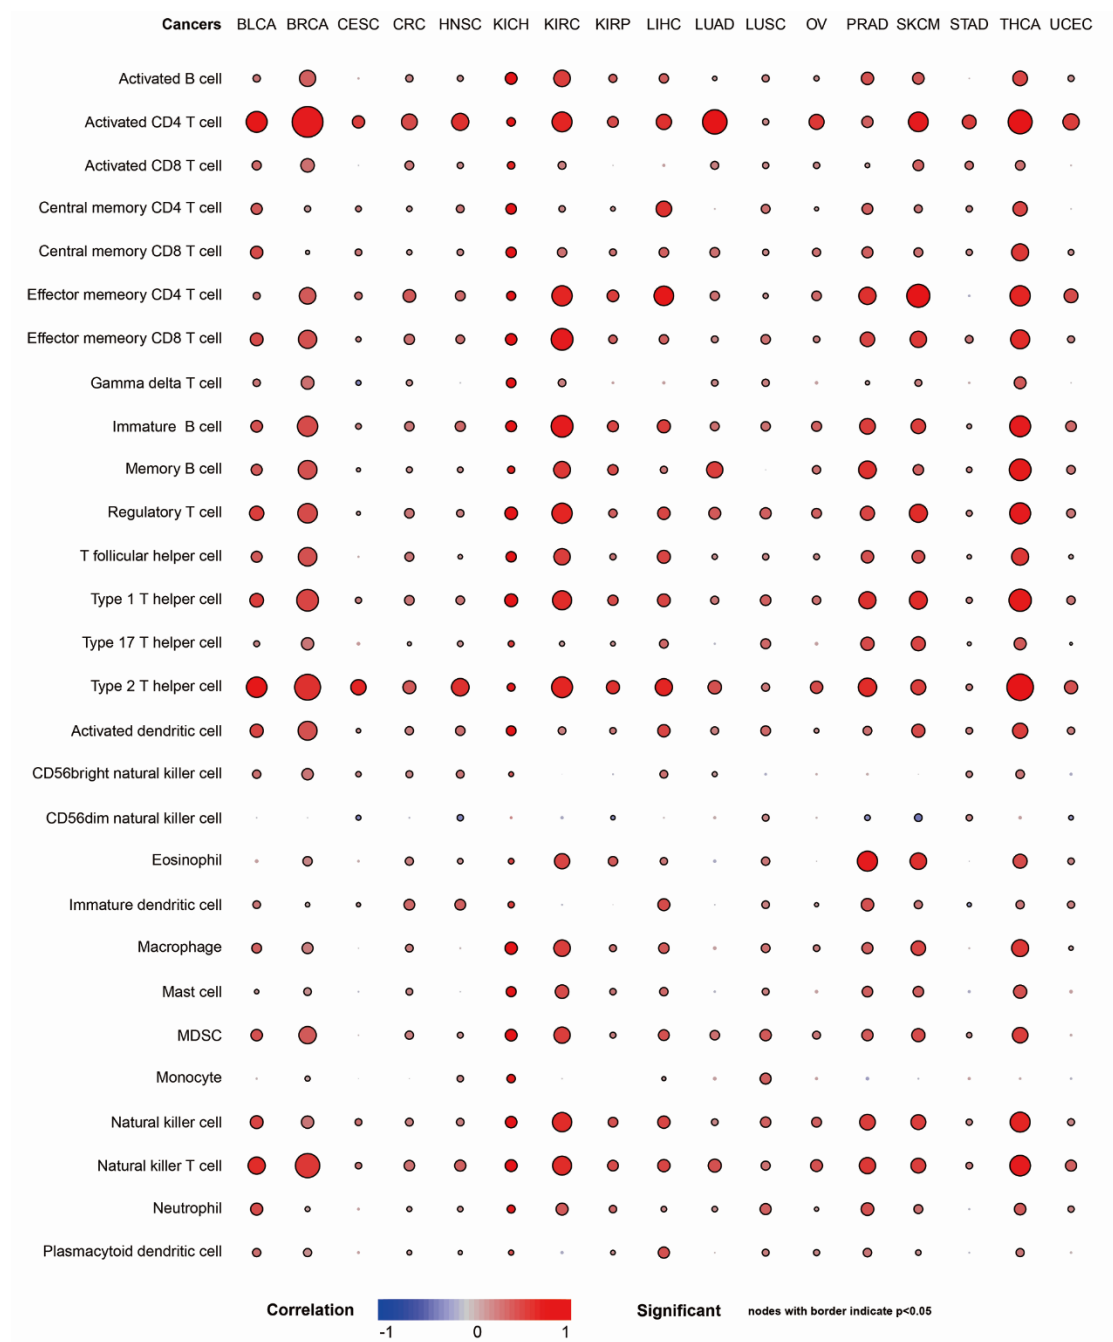

**Figure S1: The correlation between the expression of MB21D1 and the infiltration of immune cells.**

**Figure S2**

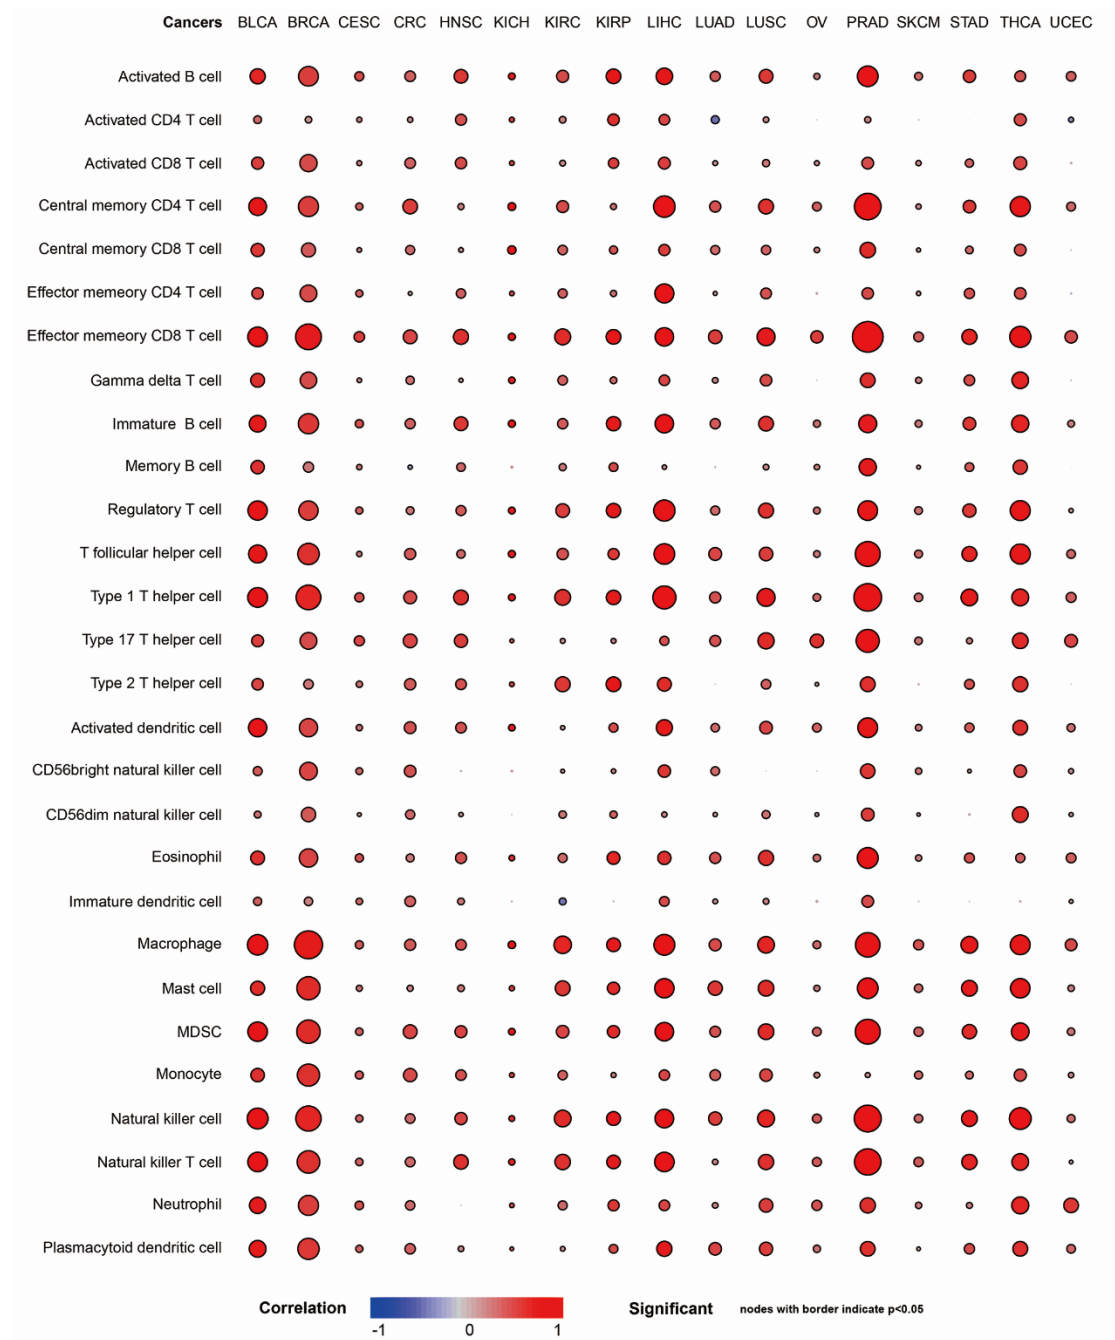

**Figure S2: The correlation between the expression of TMEM173 and the infiltration of immune cells.**

**Figure S3**

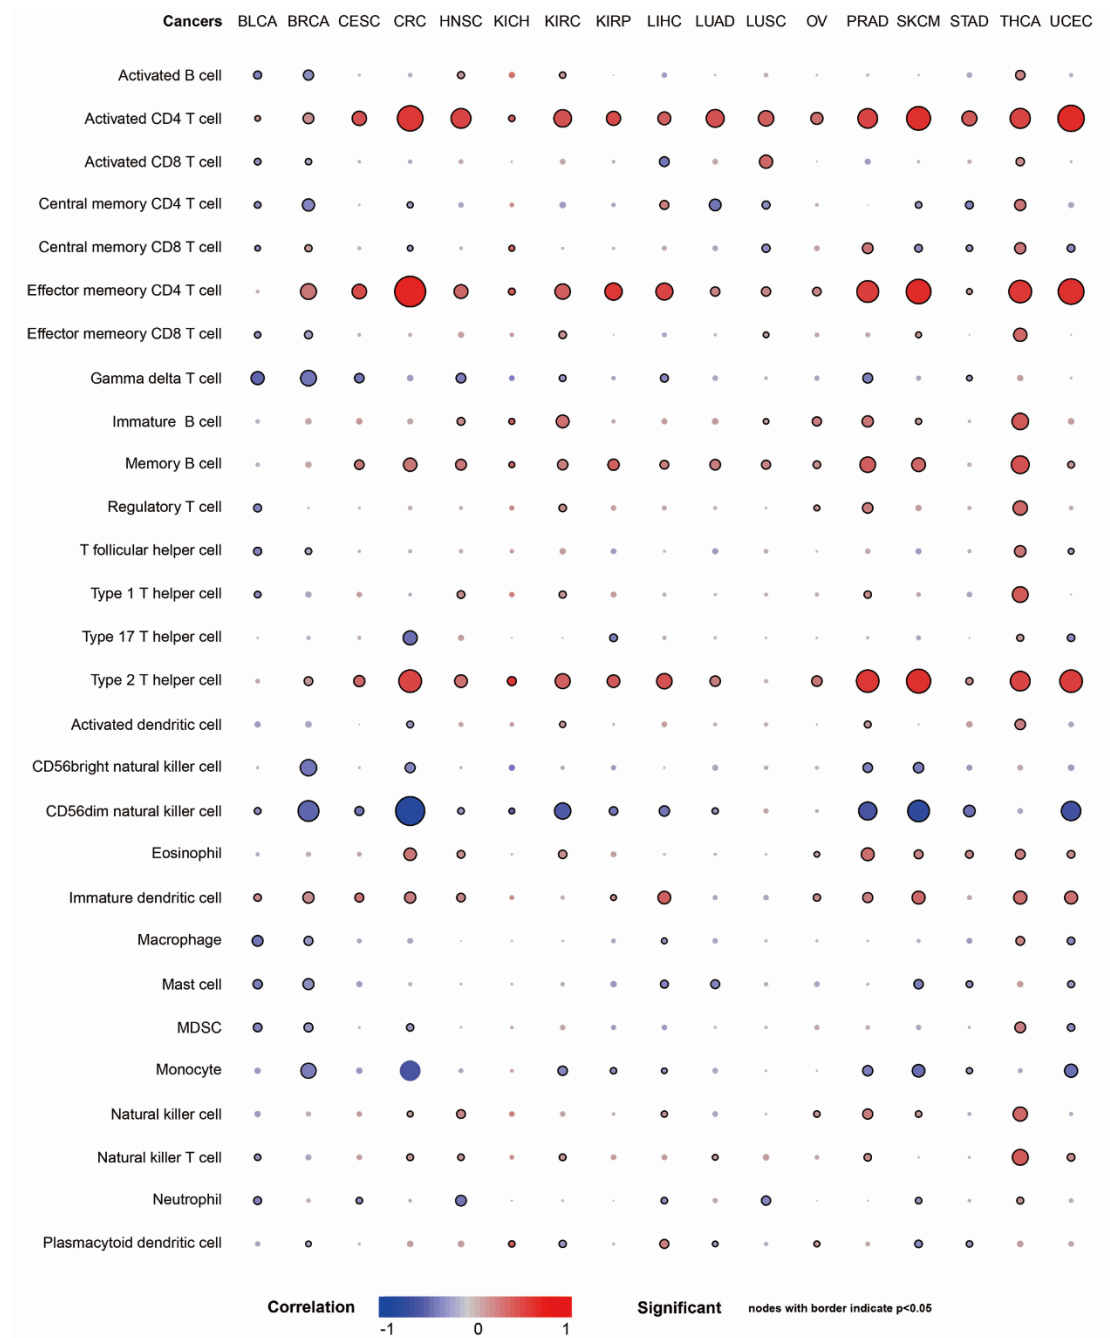

**Figure S3: The correlation between the expression of TBK1 and the infiltration of immune cells.**

**Figure S4**

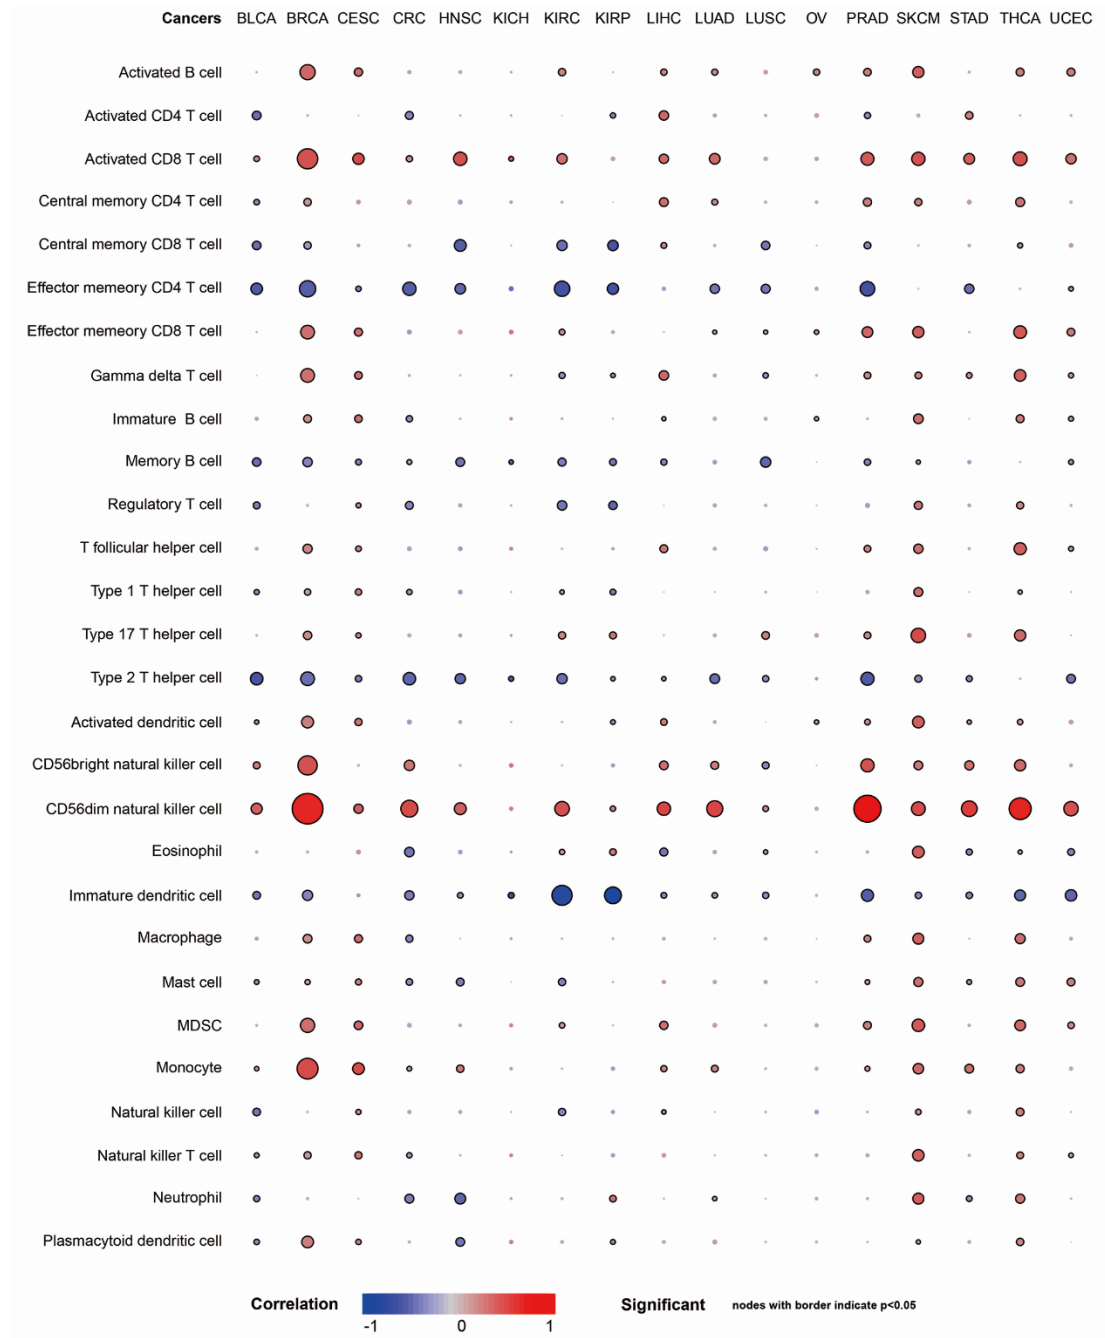

**Figure S4: The correlation between the expression of IRF3 and the infiltration of immune cells.**

Figure S5

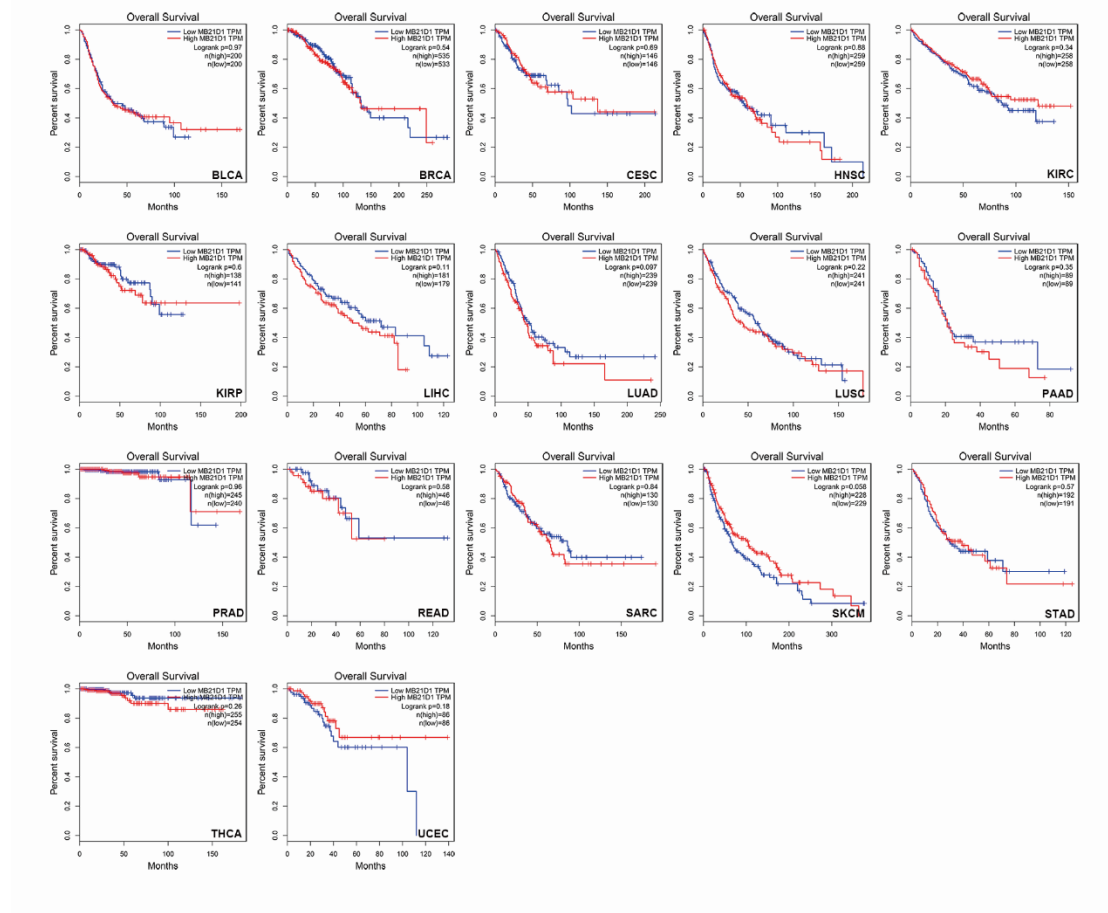

Figure S5: The correlation between MB21D1 expression and prognosis in some other tumors (Log-rank test,  $p > 0.05$ ).

Figure S6

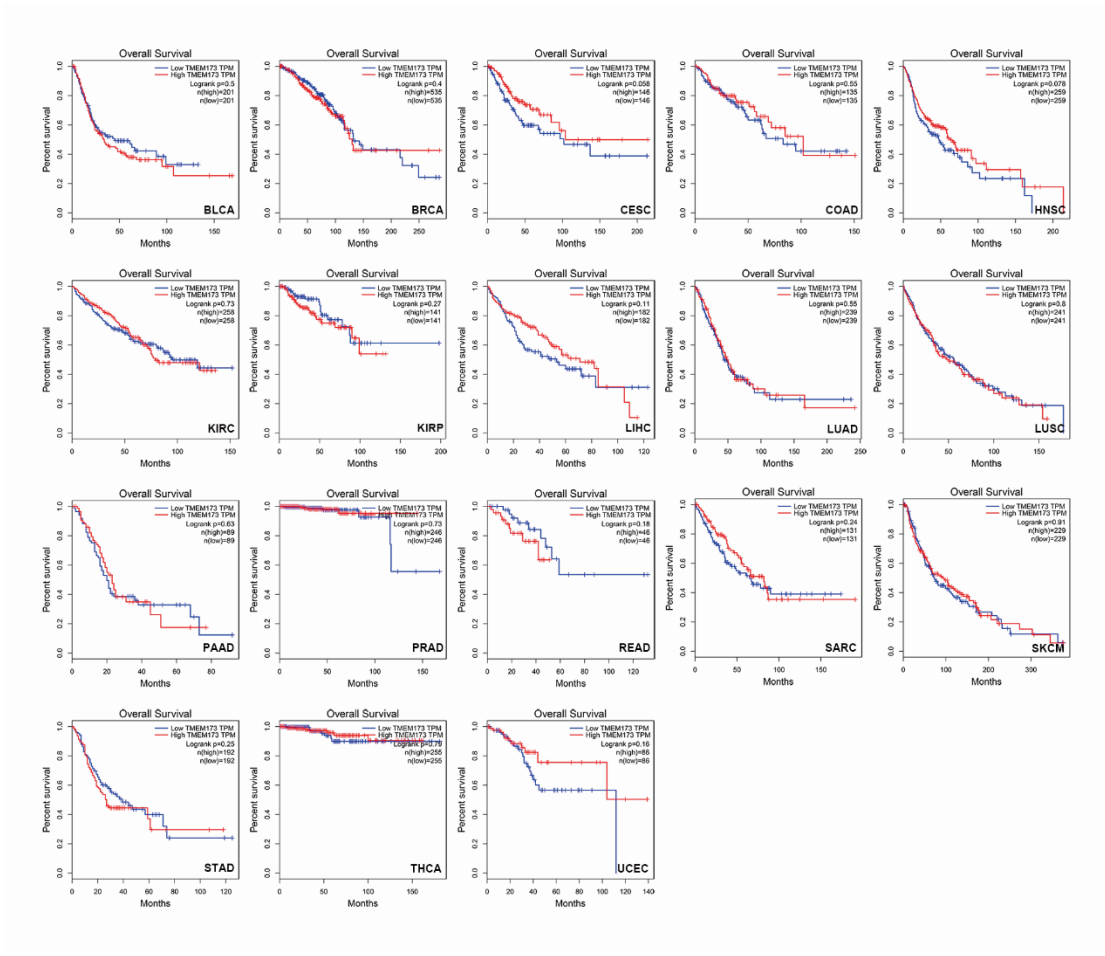

Figure S6: The correlation between TMEM173 expression and prognosis in some other tumors (Log-rank test,  $p > 0.05$ ).

Figure S7

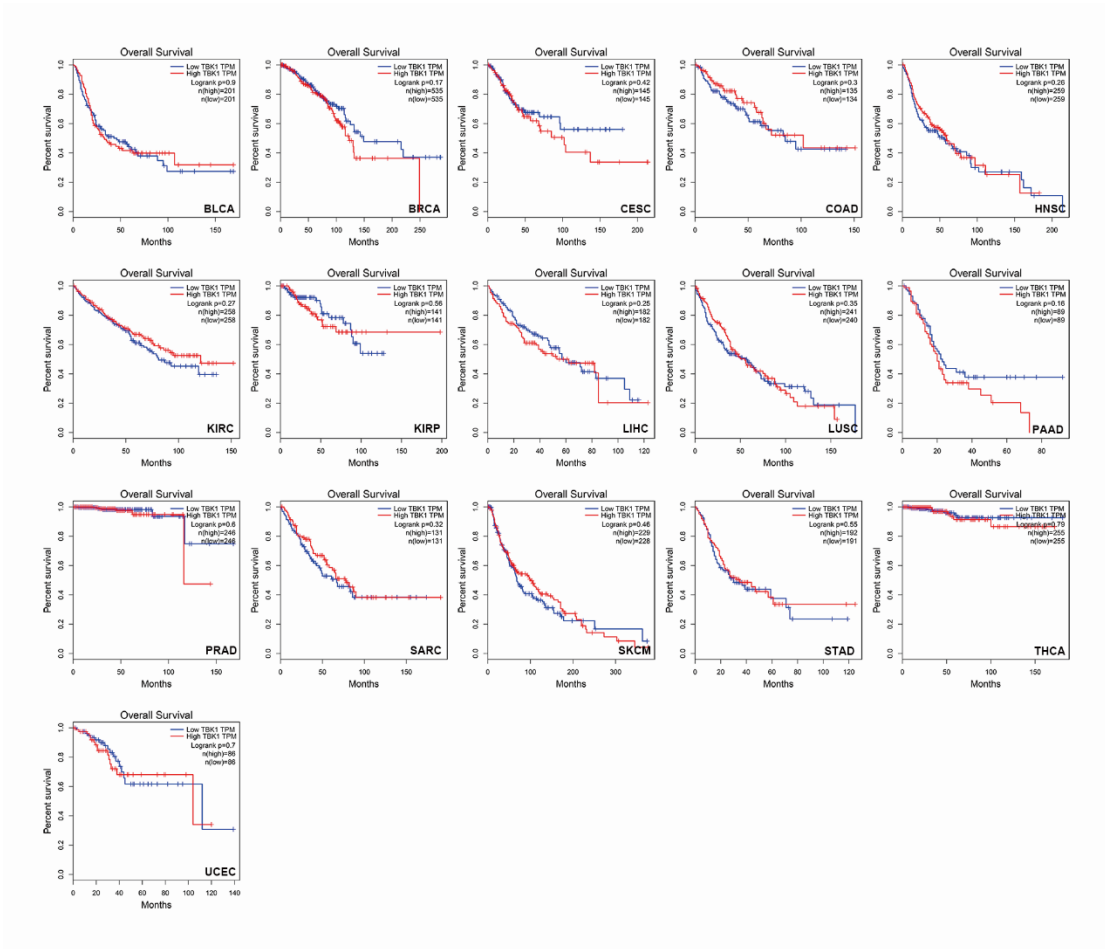

Figure S7: The correlation between TBK1 expression and prognosis in some other tumors (Log-rank test,  $p > 0.05$ ).



Figure S8

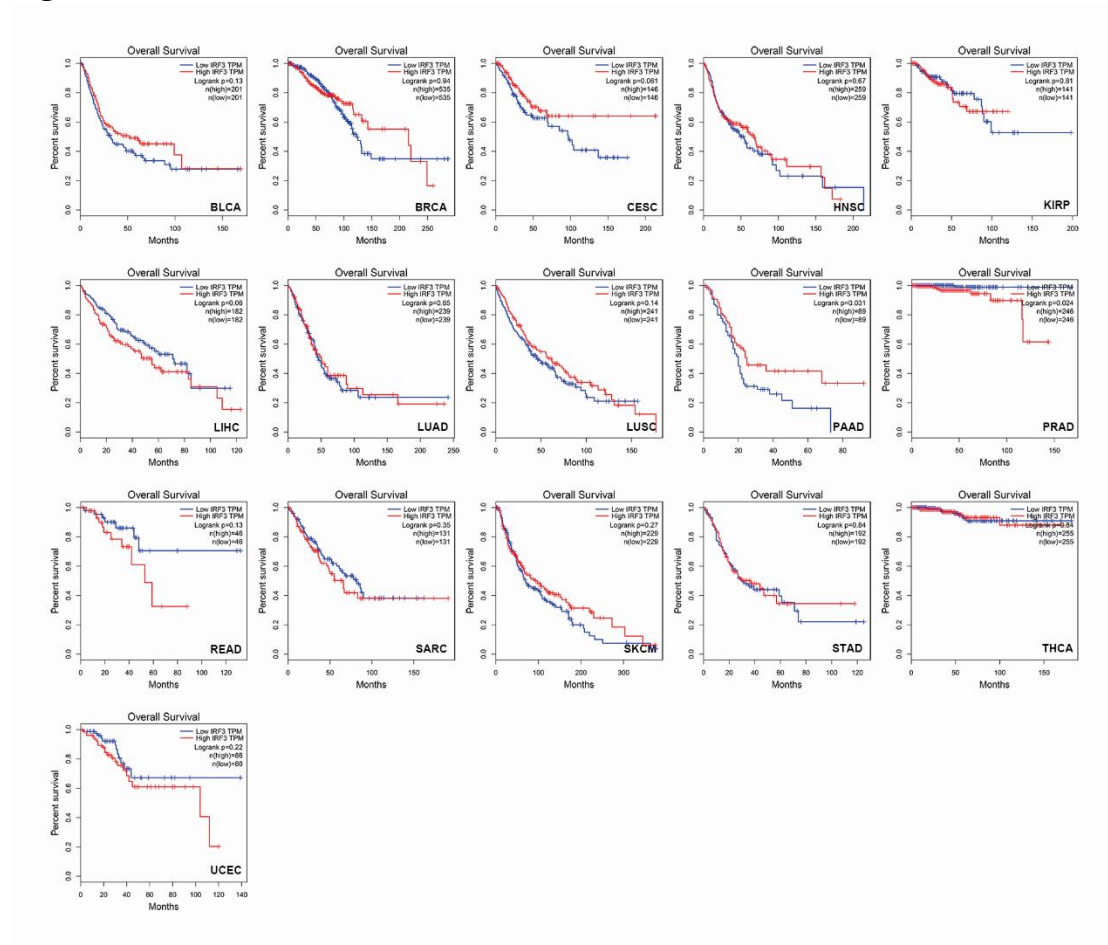

Figure S8: The correlation between IRF3 expression and prognosis in some other tumors (Log-rank test,  $p > 0.05$ ).
